# Supplementary material for: Divergent evolution of developmental timing in the neocortex revealed by marsupial and eutherian transcriptomes
Source: Oxford University Press journal article supplement (doi:10.1242/dev.200212), 2022-01-10
Supplement: dev200212supp.pdf [file dev200212supp.pdf]

```

CLONE -----GGCCGCCATGGCCGCGG-GATTA
KT380843.1 -----
RNASEQ CTTCACTCTCTCCCTCTCGGAGCTACCCCGCTCATTGTCAGAAGCGACTCTGAAGATCA

CLONE GTTCCTAGACCATGAAGCTCCAGCTTCTAGTGTCTACTGGGATCCTGCTGGTTACGCTCT
KT380843.1 -----ATCAAGTCCAGCTTCTGTGTCTACTGGGATCCTGCTGGTTACGCTCT
RNASEQ GTTCCTAGACCATGAAGCTCCAGCTTCTAGTGTCTACTGGGATCCTGCTGGTTACGCTCT
*****

CLONE TGCCTTGCCAAGAATGCAGAGCTTTATCAGCAAGGTTCCGCTTCGTCCATGGGGTCCG
KT380843.1 TGCCTTGCCAAGAATGCAGAGCTTTATCAGCAAGGTTCCGCTTCGTCCATGGGGTCCG
RNASEQ TGCCTTGCCAAGAATGCAGAGCTTTATCAGCAAGGTTCCGCTTCGTCCATGGGGTCCG
*****

CLONE CAGCTCAGCCCTGGACTTCTTCCAGCCGCGCCACC GCCCGCAATCAGCAGAGCCCC
KT380843.1 CAGCTCAGCCCTGGACTTCTTCCAGCCGCGCCACC GCCCGCAATCAGCAGAGCCCC
RNASEQ CAGCTCAGCCCTGGACTTCTTCCAGCCGCGCCACC GCCCGCAATCAGCAGAGCCCC
*****

CLONE TGCCCTTCTGTCTCCGATGGGAGAAGAATACTTCTGCGCTGGGCAACCTCAACAAGA
KT380843.1 TGCCCTTCTGTCTCCGATGGGAGAAGAATACTTCTGCGCTGGGCAACCTCAACAAGA
RNASEQ TGCCCTTCTGTCTCCGATGGGAGAAGAATACTTCTGCGCTGGGCAACCTCAACAAGA
*****

CLONE GCCCGTTGCTTCCCTCTCCTCTTGTCTCGTCTCTTCTCCTCTCCTCCCTGGAA
KT380843.1 GCCCGTTGCTTCCCTCTCCTCTTGTCTCGTCTCTTCTCCTCTCCTCCCTGGAA
RNASEQ GCCCGTTGCTTCCCTCTCCTCTTGTCTCGTCTCTTCTCCTCTCCTCCCTGGAA
*****

CLONE GCAACCTAGTAGCCCTTCTCCCGAGGTCCTCGTCTCCAACCTTTTCCGGGGGCGAG
KT380843.1 GCAACCTAGTAGCCCTTCTCCCGAGGTCCTCGTCTCCAACCTTTTCCGGGGGCGAG
RNASEQ GCAACCTAGTAGCCCTTCTCCCGAGGTCCTCGTCTCCAACCTTTTCCGGGGGCGAG
*****

CLONE TCCAAAGGCTCCAACACTGCAACTCCCGCAGCGTTCCTTAGACAGTCAGGCAGGTCTAG
KT380843.1 TCCAAAGGCTCCAACACTGCAACTCCCGCAGCGTTCCTTAGACAGTCAGGCAGGTCTAG
RNASEQ TCCAAAGGCTCCAACACTGCAACTCCCGCAGCGTTCCTTAGACAGTCAGGCAGGTCTAG
*****

CLONE GGGAGGGAGGAGCTGAGAGTACCTACGGAGAGCAGCGGGAGGCGATGGAGGGGAGAAGC
KT380843.1 GGGAGGGAGGAGCTGAGAGTACCTACGGAGAGCAGCGGGAGGCGATGGAGGGGAGAAGC
RNASEQ GGGAGGGAGGAGCTGAGAGTACCTACGGAGAGCAGCGGGAGGCGATGGAGGGGAGAAGC
*****

CLONE GATCGGAAGAACCTCCCATCTCTAGATCTGACTTTCCATCTCCTCCGAGAAGTCTTAG
KT380843.1 GATCGGAAGAACCTCCCATCTCTAGATCTGACTTTCCATCTCCTCCGAGAAGTCTTAG
RNASEQ GATCGGAAGAACCTCCCATCTCTAGATCTGACTTTCCATCTCCTCCGAGAAGTCTTAG
*****

CLONE AAATGGCCCGGGCCGAACAGTTAGCTCAGCAAGCTCACAGCAACAGGAAATGATGGAGA
KT380843.1 AAATGGCCCGGGCCGAACAGTTAGCTCAGCAAGCTCACAGCAACAGGAAATGATGGAGA
RNASEQ AAATGGCCCGGGCCGAACAGTTAGCTCAGCAAGCTCACAGCAACAGGAAATGATGGAGA
*****

CLONE TTATTGGAAAGTGAGACATCCCGTTTAACTACTA
KT380843.1 TTATTGGAAAGTGA-----
RNASEQ TTATTGGAAAGTGAGACATCCCGTTTAACTACTA
*****

```

### Fig. S1. Cloning and verification of dunnart gene Corticotropin-releasing hormone (*Crh*)

Green indicates a single synonymous nucleotide observed in the RNA-seq and clone sequences relative to the GenBank sequence KT380843.1. Magenta highlight indicates the predicted start and stop codons.

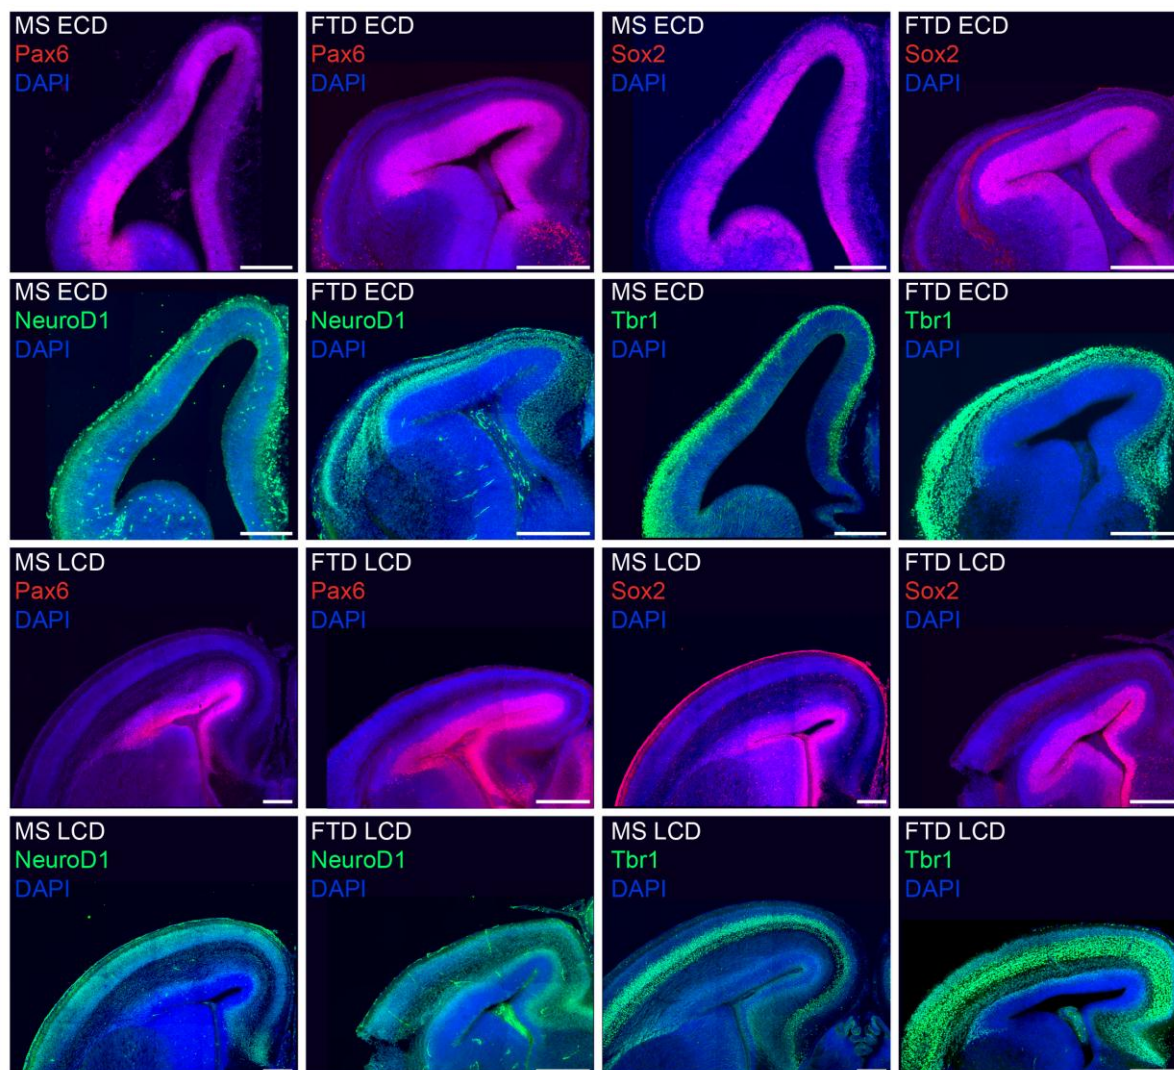

**Fig. S2. Whole cortical hemispheres of immunohistochemical labelling of known markers of progenitor and neuronal populations**

Antibodies, ages and sections directly correspond to insets and quantification from Fig. 4. ECD: early cortical development; FTD: Fat-tailed dunnart; LCD: late cortical development; Ms: Mouse. Scale bars: 250  $\mu$ m.

### **Table S1. Antibodies**

[Click here to download Table S1](#)

### **Table S2. RNA-seq statistics of dunnart replicate samples**

[Click here to download Table S2](#)

### **Table S3. Trinity-assembled dunnarts transcripts with open reading frames**

[Click here to download Table S3](#)

### **Table S4. FPKM values and expression rankings for mouse-dunnart orthologue transcripts**

[Click here to download Table S4](#)

### **Table S5. Alignment of dunnart Trinity-assembled transcriptome to mouse GRCM38 ncRNA database**

[Click here to download Table S5](#)

### **Table S6. Differential expression across developmental stages**

[Click here to download Table S6](#)

### **Table S7. Gene ontology enrichment across developmental stages and species**

[Click here to download Table S7](#)

### **Table S8. Top 30% reciprocally ranked genes across species**

[Click here to download Table S8](#)
